# Supplementary material for: DDX41 regulates the expression and alternative splicing of genes involved in tumorigenesis and immune response
Source: PubMed Central journal article supplement — Oncol Rep. 2021 Jan 25;45(3):1213–25. doi: 10.3892/or.2021.7951 (PMC7859996; doi:10.3892/or.2021.7951), 2021-01-25
Supplement: Supplementary_Data1.pdf [file Supplementary_Data1.pdf]

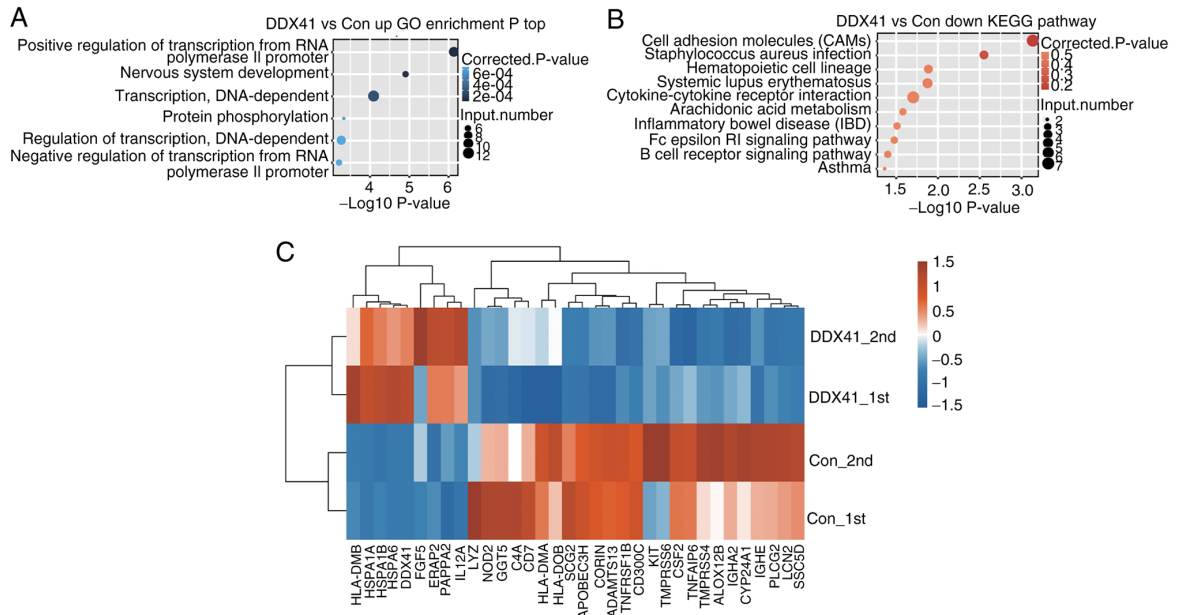

Figure S1. Analysis of immune-associated gene expression levels regulated by DDX41. (A) Top ten GO terms of upregulated gene sets. (B) Top ten KEGG pathways of downregulated gene sets. (C) Hierarchical clustering of the expression of immune-associated differentially expressed genes regulated by DDX41 overexpression in HeLa cells compared with Ctrl. GO, Gene Ontology; KEGG, Kyoto Encyclopedia of Genes and Genomes; DDX41, DEAD-box helicase 41; Ctrl, control.

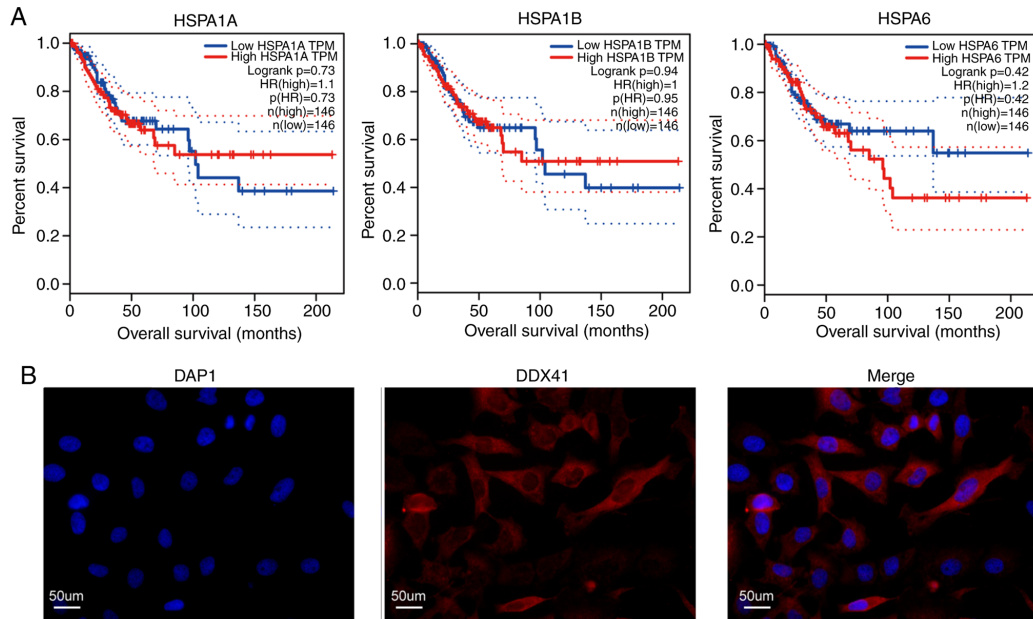

Figure S2. Kaplan-Meier curves of DDX41 upregulated genes in patients with cervical cancer. (A) Survival analysis of two genes in the Gene Expression Profiling Interactive Analysis databases of cervical and endocervical squamous carcinoma (cut-off point based on the median method). (B) Images of the DDX41 distribution ( $n=3$ ). DDX41, DEAD-box helicase 41; HR, hazard ratio.

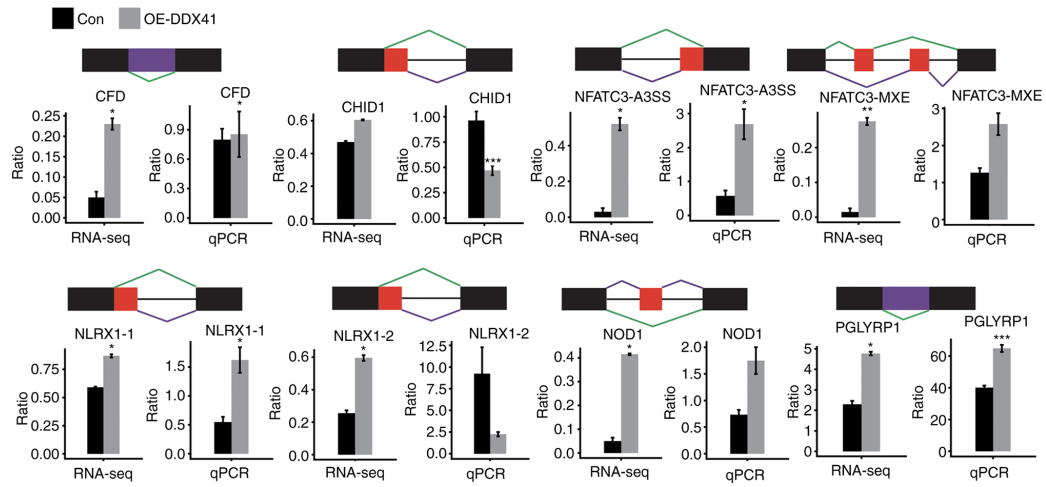

Figure S3. Schematic diagrams depicting the structures of AS1 (purple) and AS2 (green). Boxes indicate exon sequences; horizontal line indicates intron sequences. RNA-seq quantification and qPCR validation of ASEs. The changed ratio of ASEs in RNA-seq were calculated using the formula:  $\text{AS1 junction reads} / (\text{AS1 junction reads} + \text{AS2 junction reads})$ . The altered ratio of ASEs in qPCR was calculated using the formula:  $\text{AS1 transcripts level} / \text{AS2 transcripts level}$ . Con, control; OE-DDX41, overexpression DEAD-box helicase 41; RNA-seq, RNA-sequencing; qPCR, quantitative PCR.

Table S1. Primers used in reverse transcription-quantitative PCR.

| A, Overexpression                 |                        |                        |
|-----------------------------------|------------------------|------------------------|
| Gene                              | Forward primer (5'→3') | Reverse primer (5'→3') |
| <i>DDX41</i>                      | GTATCCCACCAACCCATCAAG  | ACCAGTGCTTGCCTGAACC    |
| B, Differentially expressed genes |                        |                        |
| Gene                              | Forward primer         | Reverse primer         |
| <i>IL12A</i>                      | ATTGAGATGGGAGGATTG     | CAGACATATTGTCCAGGCT    |
| <i>CD22</i>                       | GGCCTTTTCCACCTCATA     | GGATCGGATACCCATAGC     |
| <i>CD177</i>                      | ACGGAGGCCAAGGACCCAG    | CCAAAGGGGAGGGAGTT      |
| <i>CSF2</i>                       | GACCTGCCACAGACCCCG     | GGCCCTTGAGCTTGGTGA     |
| <i>SEPLG</i>                      | GGCGTCAGTCGAGTTGTC     | CAGCAGTATGGAGATACAG    |
| <i>TNFRSF1B</i>                   | GCACTCGGGAACAGAACC     | GCACCCCTCTGCTTGT       |
| <i>HSPA1A</i>                     | CGTTGTCCCAAGGCTTCC     | CTGTCCGGCTCCGCTCTGA    |
| <i>HSPA1B</i>                     | GCTGAAACCCGCAGAACAC    | TCCTCGGGGTAGAATGCC     |
| <i>HSPA6</i>                      | CGGTGCAGTCGGACATGA     | TCCTCTCGGGGTAGAACG     |
| <i>HLA-DMB</i>                    | GCCATCTTATTCTCCTCTG    | TGGAAAGCACCTGTCTGT     |
| <i>HLA-DOB</i>                    | ATCCACGGCCGTCTGCT      | GTGATGTGGGATGTTTG      |
| <i>HLA-G</i>                      | TCTACCCCTGCGGAGATCA    | CTCCAGAAGGCACCACCA     |
| <i>HPV18-E6</i>                   | ATAAGGTGCCGCGGTGCC     | TGCGTCGTTGGAGTCGTTT    |
| <i>HPV18-E7</i>                   | GAGCACGACAGGAACGACT    | GGGTGGTAATGTTGATGAT    |
| <i>HPV18-L1</i>                   | CAGGTGGTGGCAATAAGCAGGA | TGGCGCATGGGAACCTTCAG   |
| <i>GAPDH</i>                      | GGTCCGAGTCAACGGATTTG   | GGAGAATGTTGATGGGATTT   |
| C, Alternative splicing events    |                        |                        |
| Gene                              | Forward primer         | Reverse primer         |
| <i>CFD</i>                        | TGGAGGACGGGGCCGACGGG   | AGCAGGAGGTCGTGGTCCG    |
|                                   | GGTCCCCAGGGCCGACGGG    |                        |
|                                   | CCAATTCTGGATGAGGTGGTA  |                        |
| <i>PGLYRP1</i>                    |                        | AACTACATGGATCGGGTGCC   |
|                                   |                        | CCTCCTCCAGATCGGGTGCC   |
| <i>NEATC3_A3SS</i>                | CAGCACTCAACTCAAGCA     | GTAACAATAATCATCATCTAA  |
|                                   |                        | TAGGTCTCAACATCATCTAA   |
| <i>NEATC3_MEX</i>                 | CAGCACTCAACTCAAGCA     | ATAAAITGGTCATCATCTAA   |
|                                   |                        | TAGGTCTCAACATCATCTAA   |

Table S1. Continued.

| C, Alternative splicing events |     | Forward primer         | Reverse primer        |
|--------------------------------|-----|------------------------|-----------------------|
| <i>NOD1</i>                    | AS1 | TACGCTGAGTCTGAGAACAG   | CTACTGCAAACGCCTGCTC   |
|                                | AS2 | GACCTCTGCCCTGAGAACAG   |                       |
| <i>ZC3HAV1</i>                 | AS1 | AAGCGGACAAACCCTTACA    | CTTGTTAACGATTCTTTATC  |
|                                | AS2 | TCTGCTCAGTATTCTTTATC   |                       |
| <i>IFITM1</i>                  | AS1 | GACAAAGTGAGCCAGAAAGATG | TTGAACACAGGGACCCAGACG |
|                                | AS2 | TCCCCAAAGCCCAGAAAGATG  |                       |
| <i>TANK</i>                    | AS1 | TGGAGAAGAGACCTGTCAIT   | CTGCCGGAAGGCTTCATA    |
|                                | AS2 | CAAACGAGAGACCTGTCAIT   |                       |
| <i>NLRX1-1</i>                 | AS1 | CTGCCCTGAAGGACAGAAAGTC | TCGCTGGAGTGCTCTTCT    |
|                                | AS2 | GCAGCCGCGGACAGAAAGTC   |                       |
| <i>NLRX1-2</i>                 | AS1 | CCGCTGCCAGGACAGAAAGTC  | TCGCTGGAGTGCTCTTCT    |
|                                | AS2 | GCGGGCGGAGGACAGAAAGTC  |                       |
| <i>CHD1</i>                    | AS1 | GTCCAGAGGGCTGCATGTCA   | AGCCCTGCCCCAGTCCCCTGT |
|                                | AS2 | GGGTGGAAATCTGCATGTCA   |                       |

Table SII. Summary of RNA-sequencing reads used.

| Sample    | Raw reads | Clean reads | Paired-end reads | Total mapped <sup>a</sup> | Total uniquely mapped <sup>b</sup> | Splice reads <sup>c</sup> |
|-----------|-----------|-------------|------------------|---------------------------|------------------------------------|---------------------------|
| DDX41_1st | 82863280  | 79800968    | 36767980         | 69908587<br>(90.62%)      | 67381207<br>(96.38%)               | 27164706<br>(40.31%)      |
| DDX41_2nd | 87014568  | 83839108    | 36659857         | 73033917<br>(90.06%)      | 70304018<br>(96.26%)               | 27599947<br>(39.26%)      |
| Ctrl_1st  | 79477058  | 76304335    | 38572300         | 67176989<br>(91.35%)      | 64837664<br>(96.52%)               | 26594525<br>(41.02%)      |
| Ctrl_2nd  | 79182390  | 76036977    | 40548512         | 66508088<br>(90.71%)      | 64019512<br>(96.26%)               | 25577536<br>(39.95%)      |

<sup>a</sup>Percentage of paired-end reads mapped to the genome. <sup>b</sup>Percentage of unique reads mapping out of the total mapped reads. <sup>c</sup>Percentage of uniquely mapped reads mapped to splice site. DDX41, DEAD-box helicase 41; Ctrl, control.

Table SIII. Numbers of genes expressed in each sample.

| Sample      | Expressed genes |        |
|-------------|-----------------|--------|
|             | FPKM>0          | FPKM≥1 |
| OECtrl_1st  | 24,499          | 13,173 |
| OECtrl_2nd  | 25,045          | 13,164 |
| DDX41_1st   | 24,618          | 12,892 |
| DDX41_2nd   | 24,440          | 12,885 |
| Total genes | 28,914          |        |

OE, overexpression; Ctrl, control; DDX41, DEAD-box helicase 41; FPKM, fragments per kilobase of transcript per million.
