# Supplementary material for: DDX41 regulates the expression and alternative splicing of genes involved in tumorigenesis and immune response
Source: PubMed Central journal article supplement — Oncol Rep. 2021 Jan 25;45(3):1213–25. doi: 10.3892/or.2021.7951 (PMC7859996; doi:10.3892/or.2021.7951), 2021-01-25
Supplement: Supplementary_Data3.pdf [file Supplementary_Data3.pdf]

Table SV. Known or novel splicing events detected from ABLas.

| A, Known splicing events |       |       |        |           |        |           |       |         |     |              |        |                   |
|--------------------------|-------|-------|--------|-----------|--------|-----------|-------|---------|-----|--------------|--------|-------------------|
| Sample                   | 3pMXE | 5pMXE | A3SS   | A3SS + ES | A5SS   | A5SS + ES | ES    | IntronR | MXE | cassetteExon | Total  | Detected junction |
| Ctrl_1st                 | 363   | 658   | 3247   | 349       | 3708   | 464       | 2,502 | 1,176   | 319 | 1,826        | 14,612 | 149,096           |
| Ctrl_2nd                 | 368   | 657   | 3303   | 358       | 3815   | 470       | 2,563 | 1,169   | 339 | 1,865        | 14,907 | 150,168           |
| DDX41_1st                | 392   | 663   | 3287   | 362       | 3773   | 473       | 2,576 | 1,188   | 321 | 1,805        | 14,840 | 149,260           |
| DDX41_2nd                | 372   | 664   | 3254   | 350       | 3758   | 466       | 2,542 | 1,191   | 293 | 1,793        | 14,683 | 148,479           |
| Total                    | 527   | 956   | 4543   | 487       | 5313   | 655       | 3,389 | 1,621   | 510 | 2,531        | 20,532 | 165,551           |
| B, Novel splicing events |       |       |        |           |        |           |       |         |     |              |        |                   |
| Sample                   | 3pMXE | 5pMXE | A3SS   | A3SS + ES | A5SS   | A5SS + ES | ES    | IntronR | MXE | cassetteExon | Total  | Detected junction |
| Ctrl_1st                 | 897   | 2,163 | 4,443  | 480       | 6,349  | 623       | 1,999 | 7,782   | 286 | 1,209        | 26,231 | 81,310            |
| Ctrl_2nd                 | 884   | 2,216 | 4,591  | 524       | 6,305  | 636       | 1,946 | 7,950   | 326 | 1,219        | 26,597 | 86,626            |
| DDX41_1st                | 862   | 2,041 | 4,377  | 527       | 6,146  | 593       | 1,876 | 8,161   | 305 | 1,182        | 26,070 | 86,505            |
| DDX41_2nd                | 869   | 2,106 | 4,566  | 503       | 6,379  | 602       | 2,041 | 8,579   | 294 | 1,266        | 27,205 | 86,394            |
| Total                    | 2,208 | 4,947 | 11,292 | 1,402     | 15,012 | 1,573     | 4,412 | 16,237  | 766 | 2,805        | 60,654 | 204,324           |

Predicted novel introns are omitted. 3pMXE, MXE + alternative polyadenylation site; 5pMXE, MXE + alternative 5' promoter; A3SS, alternative 3' splice site; ES, exon skipping; A5SS, alternative 5' splice site; IntronR, intron retention; MXE, mutual exclusive ES; DDX41, DEAD-box helicase 41; Ctrl, control.
